# Supplementary material for: Treat-to-target in rheumatoid arthritis: a real-world study of the application and impact of treat-to-target within the wider context of patient management, patient centricity and advanced therapy use in Europe
Source: PubMed Central journal article supplement — RMD Open. 2022 Dec 22;8(2):e002658. doi: 10.1136/rmdopen-2022-002658 (PMC9791437; doi:10.1136/rmdopen-2022-002658), 2022-12-22
Supplement: rmdopen-2022-002658supp001.pdf [file rmdopen-2022-002658supp001.pdf]

**Supplementary Table 1: Physician reported patient demographics and clinical status**

|                                                        | <b>All patients*<br/>(n=3120)</b> | <b>Patients who completed the<br/>voluntary patient-reported<br/>questionnaire#<br/>(n=1050)</b> |
|--------------------------------------------------------|-----------------------------------|--------------------------------------------------------------------------------------------------|
| <b>Age (years), mean (SD) [n]</b>                      | 53.1 (14.0)                       | 52.4 (13.7)                                                                                      |
| <b>Sex, n (%)</b>                                      |                                   |                                                                                                  |
| Male                                                   | 1037 (33.2)                       | 389 (37.0)                                                                                       |
| Female                                                 | 2083 (66.8)                       | 661 (63.0)                                                                                       |
| <b>BMI, mean (SD)</b>                                  | 25.5 (4.1)                        | 25.4 (4.0)                                                                                       |
| <b>Ethnicity, n (%)</b>                                |                                   |                                                                                                  |
| White/Caucasian                                        | 2780 (89.1)                       | 964 (91.8)                                                                                       |
| Asian (Indian subcontinent)                            | 61 (2.0)                          | 10 (1.0)                                                                                         |
| Asian (other)                                          | 13 (0.4)                          | 3 (0.3)                                                                                          |
| Hispanic/Latino                                        | 95 (3.0)                          | 29 (2.8)                                                                                         |
| Middle Eastern                                         | 56 (1.8)                          | 18 (1.7)                                                                                         |
| Mixed race                                             | 30 (1.0)                          | 13 (1.2)                                                                                         |
| Afro-Caribbean                                         | 62 (2.0)                          | 10 (1.0)                                                                                         |
| South-East Asian                                       | 20 (0.6)                          | 3 (0.3)                                                                                          |
| Other                                                  | 2 (0.1)                           | 0 (0.0)                                                                                          |
| <b>Employment status, n (%)</b>                        |                                   |                                                                                                  |
| Working full time                                      | 1397 (44.8)                       | 516 (49.1)                                                                                       |
| Working part time                                      | 406 (13.0)                        | 125 (11.9)                                                                                       |
| On long term sick leave                                | 86 (2.8)                          | 29 (2.8)                                                                                         |
| Homemaker                                              | 263 (8.4)                         | 86 (8.2)                                                                                         |
| Student                                                | 52 (1.7)                          | 16 (1.5)                                                                                         |
| Retired                                                | 727 (23.3)                        | 223 (21.2)                                                                                       |
| Unemployed                                             | 107 (3.4)                         | 32 (2.2)                                                                                         |
| Don't know                                             | 82 (2.6)                          | 23 (2.2)                                                                                         |
| <b>Physician-perceived disease<br/>activity, n (%)</b> |                                   |                                                                                                  |
| Remission (DAS28 <2.6)                                 | 1327 (42.5)                       | 416 (39.6)                                                                                       |
| Low (DAS28 2.6-3.2)                                    | 1063 (34.1)                       | 340 (32.4)                                                                                       |
| Moderate (DAS28 3.2-5.1)                               | 613 (19.6)                        | 248 (23.6)                                                                                       |
| High (DAS28 >5.1)                                      | 117 (3.8)                         | 46 (4.4)                                                                                         |

\* Patients for whom physician-reported patient record forms were available

# Patients who completed the self-reported questionnaire, completed voluntarily with no financial incentivisation
